# Supplementary material for: Profiling mycobacterial communities in pulmonary nontuberculous mycobacterial disease
Source: PLOS journal article supplement (doi:10.1371/journal.pone.0208018), 2018-12-11
Supplement: S6 (10.1371/journal.pone.0208018.s006) [file journal.pone.0208018.s006]

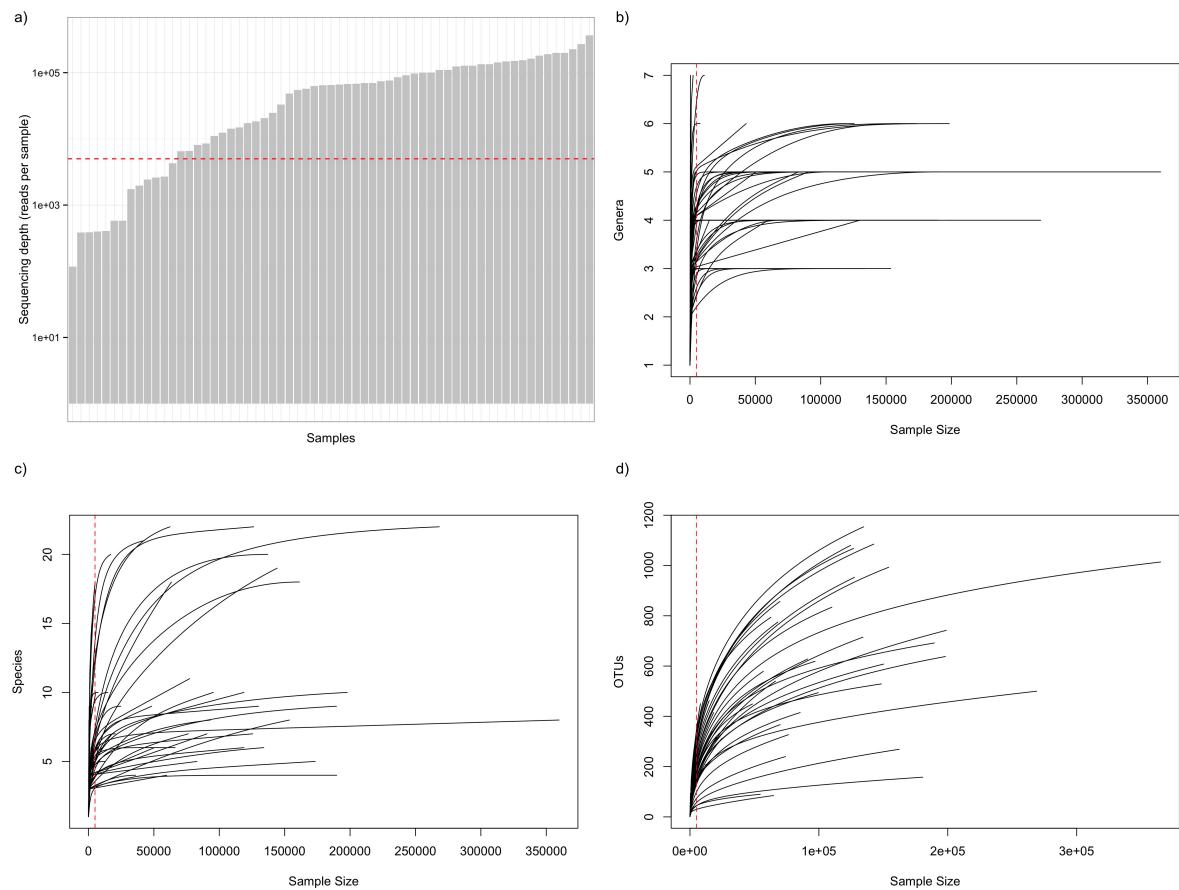

**S1 Fig. Selection of minimum sequencing depth.** A) Sequencing depth per sample; X-axis = samples, Y-axis = number of sequences per samples, dotted line = 5000 sequences. B,C,D) Rarefaction curves at Genus, Species and OUT level respectively; X-axis = Sequencing depth, Y-axis = Number of taxa, dotted line = 5000 sequences
