# Supplementary material for: Profiling mycobacterial communities in pulmonary nontuberculous mycobacterial disease
Source: PLOS journal article supplement (doi:10.1371/journal.pone.0208018), 2018-12-11
Supplement: S8 (10.1371/journal.pone.0208018.s008) [file journal.pone.0208018.s008]

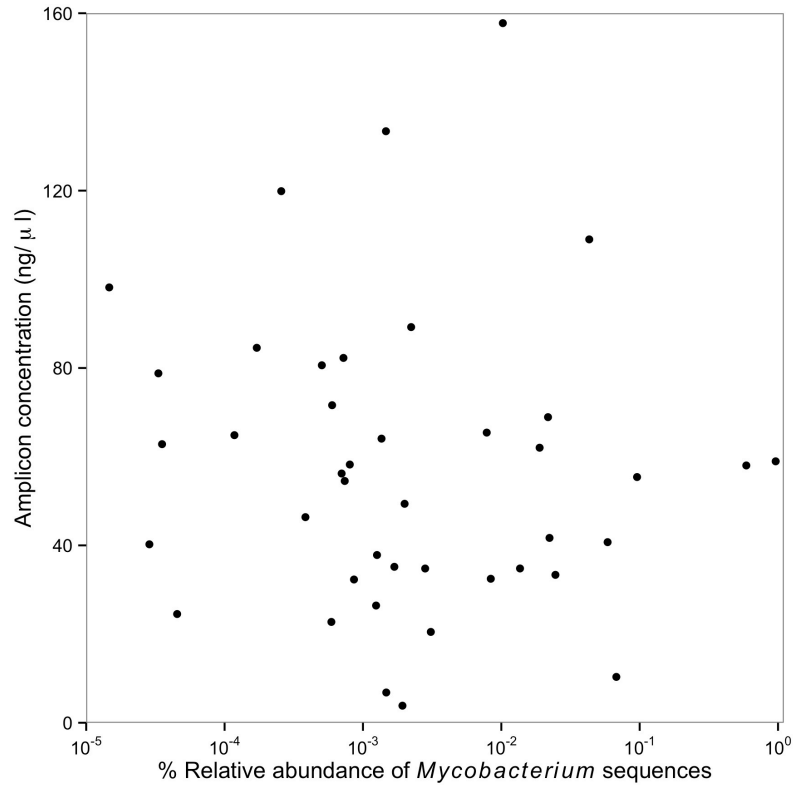

**S3 Fig. Mycobacterial abundance and *hsp65* amplicon concentration prior to library pooling.** X-axis = relative abundance of *Mycobacterium* sequences (%); Y-axis = *hsp65* amplicon concentration (ng/μl).
