# Supplementary material for: Profiling mycobacterial communities in pulmonary nontuberculous mycobacterial disease
Source: PLOS journal article supplement (doi:10.1371/journal.pone.0208018), 2018-12-11
Supplement: S9 (10.1371/journal.pone.0208018.s009) [file journal.pone.0208018.s009]

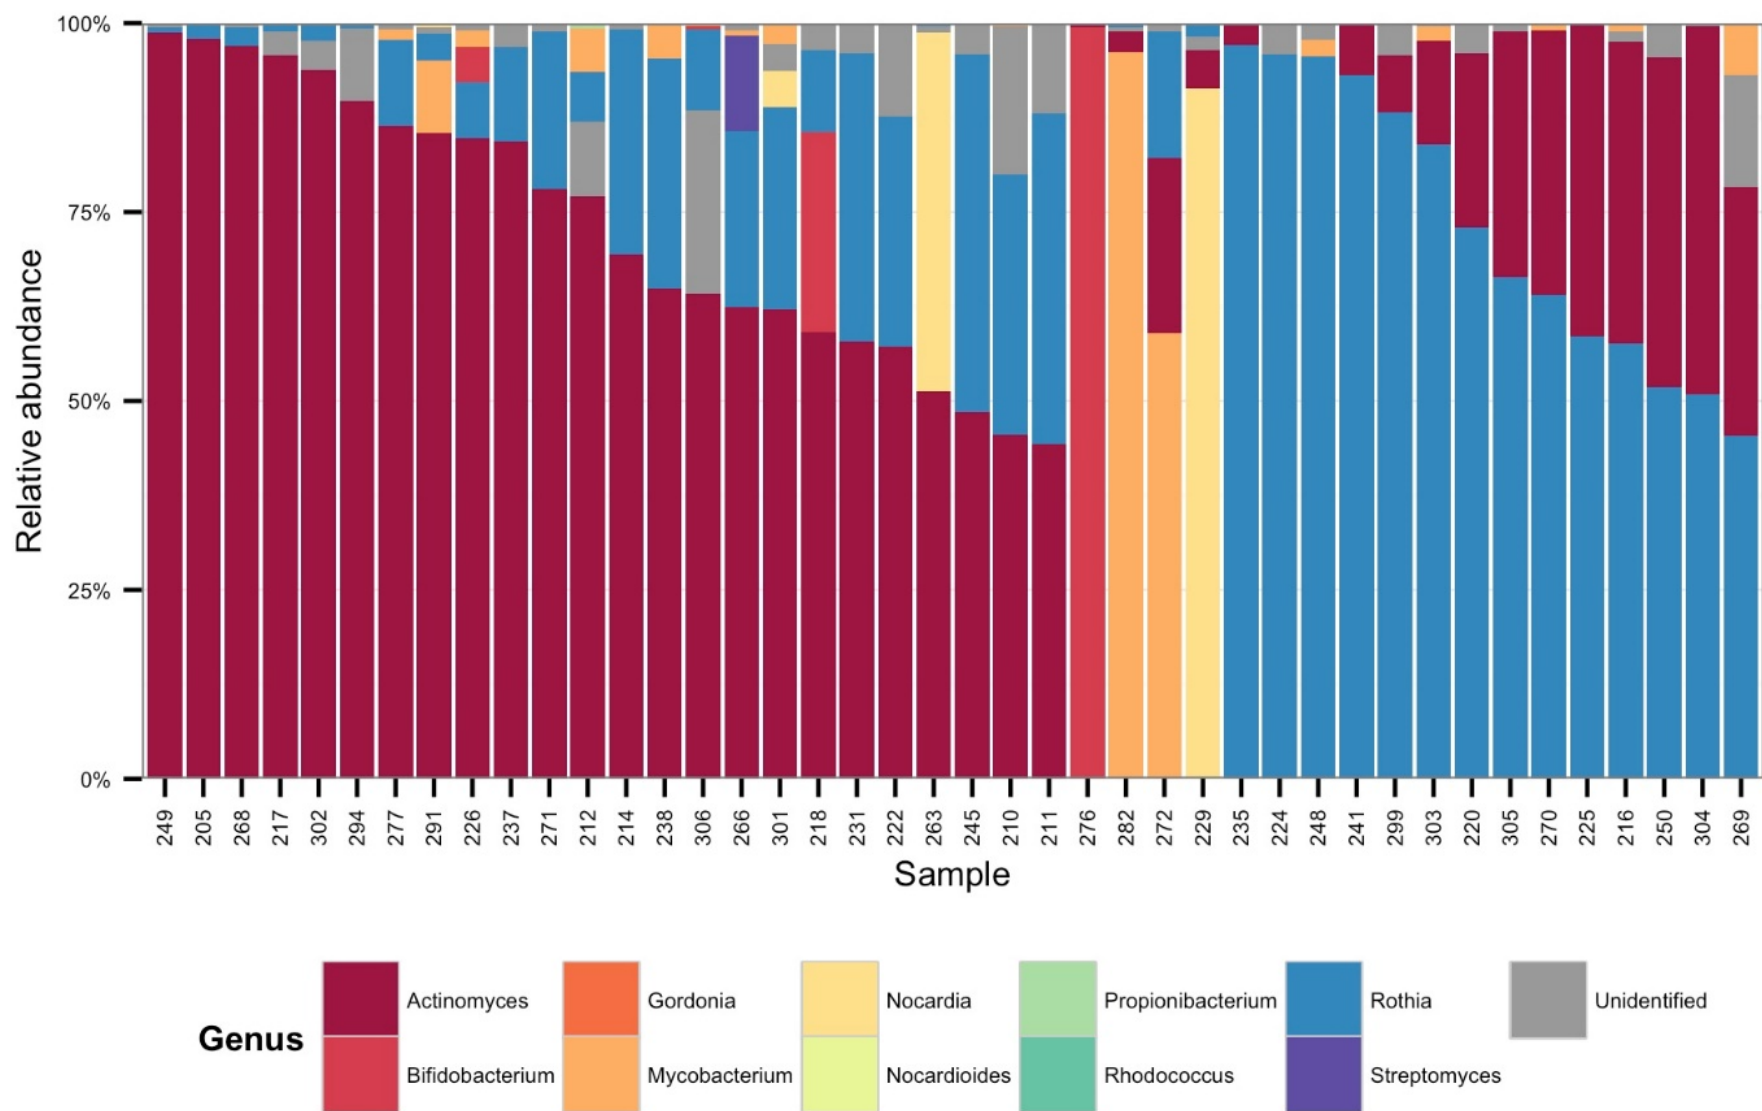

**S4 Fig: Genus level community structure by sample.** X-axis = samples, y-axis = proportional abundance, colours = genera as indicated by key.
