# Supplementary material for: Profiling mycobacterial communities in pulmonary nontuberculous mycobacterial disease
Source: PLOS journal article supplement (doi:10.1371/journal.pone.0208018), 2018-12-11
Supplement: S10 (10.1371/journal.pone.0208018.s010) [file journal.pone.0208018.s010]

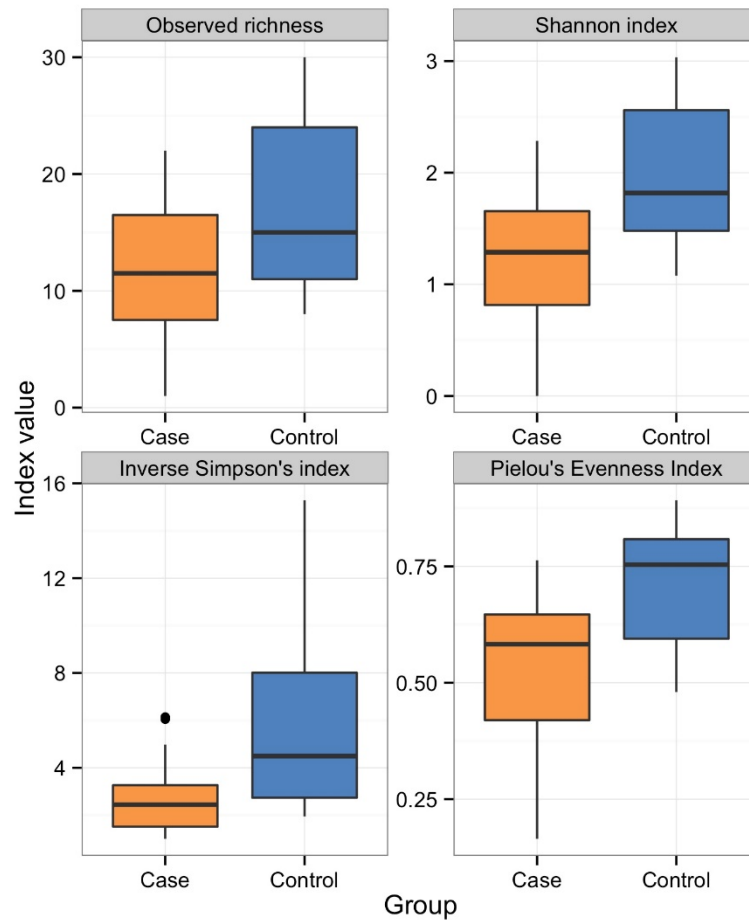

**S5 Fig: Mycobacterial alpha diversity between controls (blue) and cases (orange).** X-axis = study group, Y-axis = diversity index value. Shannon Index ( $P = 0.05$ ) and Pielou's Evenness Index ( $P = 0.028$ ) were significantly lower in cases; there was no significant difference in Observed richness ( $P = 0.166$ ) or Inverse Simpson's Index ( $P = 0.109$ ).
