# Supplementary material for: Profiling mycobacterial communities in pulmonary nontuberculous mycobacterial disease
Source: PLOS journal article supplement (doi:10.1371/journal.pone.0208018), 2018-12-11
Supplement: S11 (10.1371/journal.pone.0208018.s011) [file journal.pone.0208018.s011]

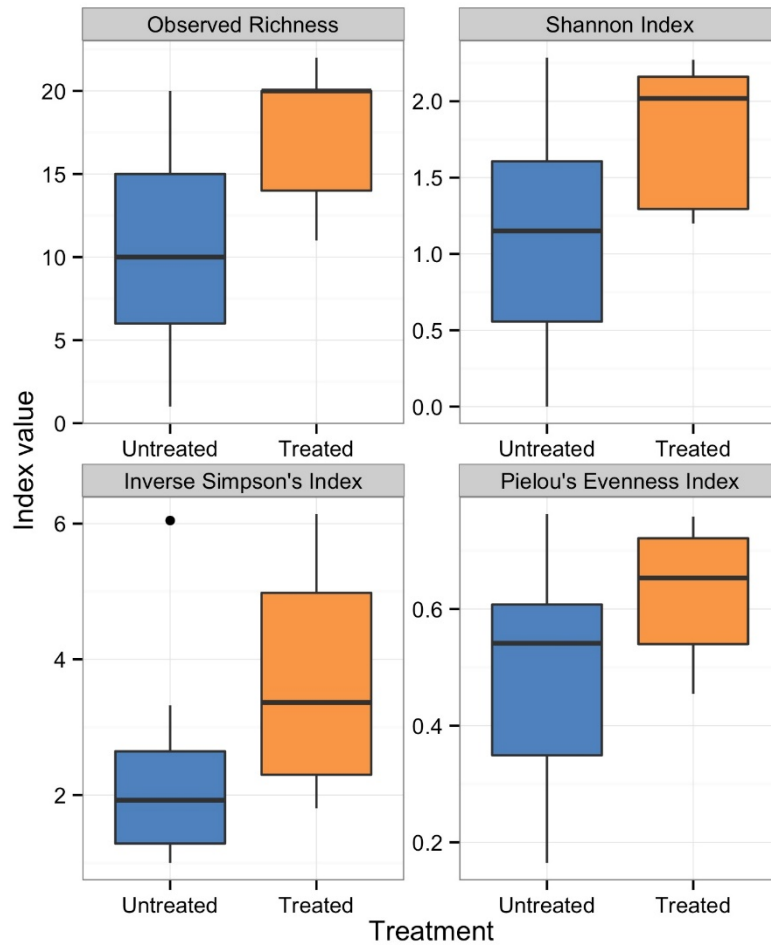

**S6 Fig: Mycobacterial alpha diversity between untreated (blue) and treated (orange) cases.** X-axis = treatment group, Y-axis = diversity index value. Shannon Index ( $P = 0.035$ ) and Observed richness ( $P = 0.021$ ) were significantly lower in cases; there was no difference in Pielou's Evenness Index ( $P = 0.091$ ) or Inverse Simpson's Index ( $P = 0.166$ ).
