# Supplementary material for: Profiling mycobacterial communities in pulmonary nontuberculous mycobacterial disease
Source: PLOS journal article supplement (doi:10.1371/journal.pone.0208018), 2018-12-11
Supplement: S12 (10.1371/journal.pone.0208018.s012) [file journal.pone.0208018.s012]

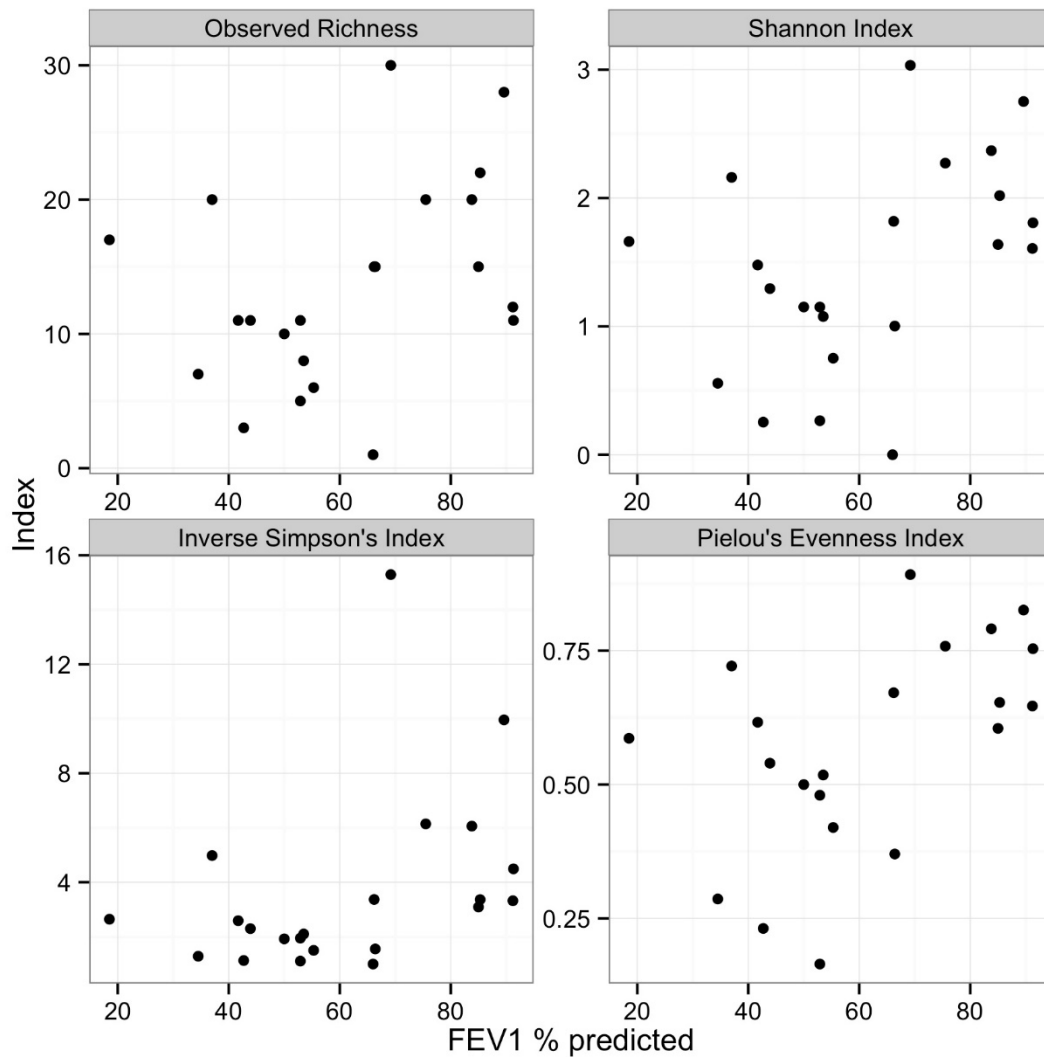

**S7 Fig: Mycobacterial alpha diversity and forced expiratory volume in 1 second (FEV<sub>1</sub>) in NTM cases.** X-axis = FEV<sub>1</sub> % predicted, Y-axis = diversity index value. There was a significant positive correlation for Shannon Index ( $r = 0.43$  (95% CI 0.01 to 0.72),  $P = 0.044$ ) and Pielou's Evenness Index ( $r = 0.51$  (95% CI 0.10 to 0.77),  $P = 0.018$ ) but not for Observed richness ( $r = 0.37$  (95% CI -0.06 to 0.69),  $P = 0.09$ ) or Inverse Simpson's Index ( $r = 0.07$  (95% CI -0.04 to 0.70),  $P = 0.39$ ).
