# Supplementary material for: Profiling mycobacterial communities in pulmonary nontuberculous mycobacterial disease
Source: PLOS journal article supplement (doi:10.1371/journal.pone.0208018), 2018-12-11
Supplement: S13 (10.1371/journal.pone.0208018.s013) [file journal.pone.0208018.s013]

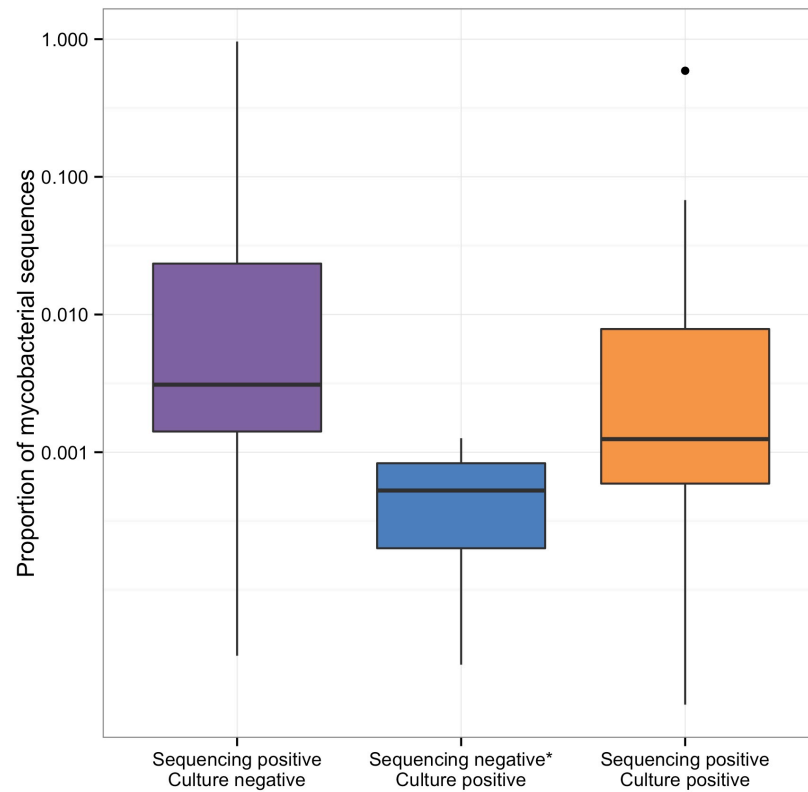

**S8 Fig: Proportion of mycobacterial sequences and discordance between sequencing and culture.** X-axis = sequencing/ culture discordance, Y-axis = Proportion of mycobacterial sequence. \* refers to samples where the cultured NTM was not detected by sequencing.
